# Supplementary material for: Design of an apoptotic cell-mimetic wound dressing using phosphoserine–chitosan hydrogels
Source: Royal Society of Chemistry journal article supplement (doi:10.1039/d3bm01259j), 2023-01-01
Supplement: d3bm01259j1.pdf [file d3bm01259j1.pdf]

## Supporting Information

### Design of Apoptotic Cell-Mimetic Wound Dressing using Phosphoserine-Chitosan Hydrogels

*a. Research Center for Macromolecules and Biomaterials, National Institute for Materials Science (NIMS), 1-1 Namiki, Tsukuba 305-0044, Japan*

*b. Graduate School of Pure and Applied Sciences, University of Tsukuba, 1-1-1 Tennodai, Tsukuba 305-8577, Japan.*

*c. Biotechnology and Life Sciences Department, Faculty of Postgraduate Studies for Advanced Sciences (PSAS), Beni-Suef University, Beni-Suef 62511, Egypt*

*d. Department of Polymer Science and Engineering, Kumoh National Institute of Technology, Gumi, Gyeongbuk 39177, Korea<sup>†</sup>* Footnotes relating to the title and/or authors should appear here.

Gyeongwoo Lee <sup>a, b</sup>, Ahmed Nabil <sup>a, c</sup>, Oh Hyeong Kwon <sup>d</sup>, and Ebara Mitsuhiro <sup>\*a, b, e</sup>

#### Table of contents:

- **Table S1 Feed ratio of each reagent for PS/HPA conjugated chitosan synthesis.**
- **Fig. S1 Schematic diagram for the hydrogel formation of PS/HPA conjugated chitosan through enzyme/catalyst reaction.**
- **Fig. S2 Equilibrium swelling ratio of the freeze-dried CS hydrogel and CS-PS hydrogels in PBS at 37°C (Mean ± SD, n=8, \*\*: P<0.01).**
- **Fig. S3 cell viability of NIH3T3 cell line by CS and CS-PS hydrogels. Protocol was followed ISO-10993 cytotoxicity test. (Mean ± SD, n=6)**
- **Fig. S4 Cytokine secretion of IL-10 from macrophage treated by CS and CS-PS hydrogels. (Mean ± SD, n=8)**
- **Fig. S5. Cytokine secretion of the pro-inflammatory cytokine IL6 treated by PS nanoparticle, CS, and CS-PS. (Mean ± SD, n=8, \*\*\*: p<0.001)**
- **Fig. S6 Blood glucose level of rats before the introduction of diabetes and during wound healing.**
- **Fig. S7 Masson's trichrome histological photomicrographs of wound lesion harvested after 15 days of treatment with PU film, CS, and CS-PS. (A: non-diabetic rat treated by PU film; B: diabetic rat treated by polyurethane (PU) film; C: diabetic rat treated by CS; D: diabetic rat treated by CS-PS.)**
- **Fig. S8. Investigated cell populations of a) IL-6, b) IL-10, and c) TGF-β1 positive cells in the wound tissue after 15 days from wound introduction.**
- **Fig. S9 Bacterial growth on nutrient agar (blue) and cystine-lactose-electrolyte-deficient (CLED) agar collected from diabetic wound surface treated by PU film, CS, and CS-PS in the day of 5, 10, and 15.**
- **Table S2. Diverse anti-biotic susceptibility results of bacteria collected on the diabetic wound on the day 5, 10, and 15.**
- **Fig. S10 Flow cytometry histogram of a) IL-6, b) IL-10, and c) TGF-β1 cells in wound tissues.**

| <b>Experimental group</b> | <b>Chitosan</b> | <b>EDC</b> | <b>NHS</b> | <b>HPA</b> | <b>Boc-PS</b> |
|---------------------------|-----------------|------------|------------|------------|---------------|
| <b>CS</b>                 | <b>100</b>      | <b>100</b> | <b>25</b>  | <b>5</b>   | <b>0</b>      |
| <b>CS-PS 7</b>            | <b>100</b>      | <b>100</b> | <b>25</b>  | <b>5</b>   | <b>5</b>      |
| <b>CS-PS 44</b>           | <b>100</b>      | <b>100</b> | <b>25</b>  | <b>5</b>   | <b>50</b>     |
| <b>CS-PS 56</b>           | <b>100</b>      | <b>100</b> | <b>25</b>  | <b>5</b>   | <b>100</b>    |

**Table S1 Feed ratio of each reagent for PS/HPA conjugated chitosan synthesis.**

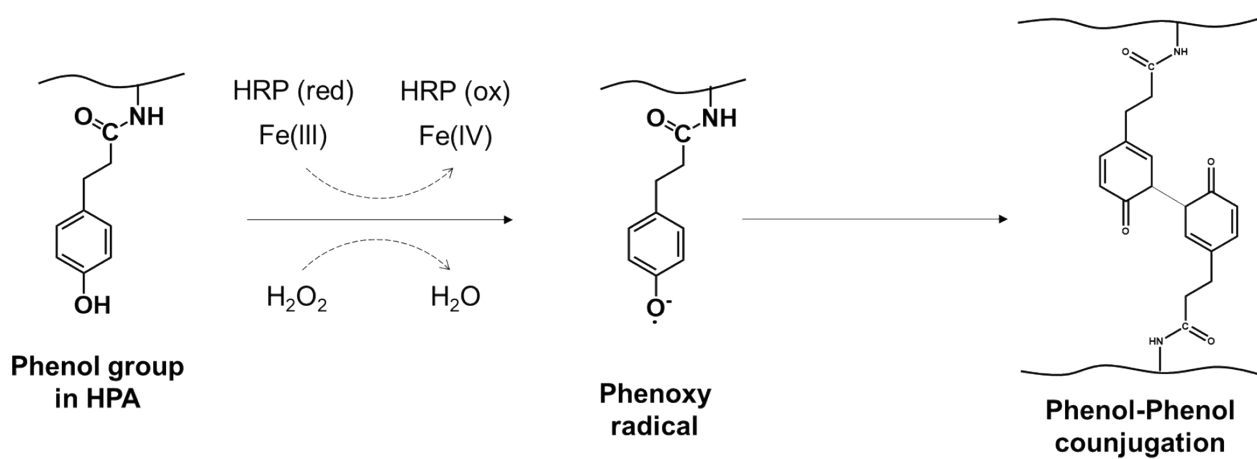

**Fig. S1 Schematic diagram for the hydrogel formation of PS/HPA conjugated chitosan through enzyme/catalyst reaction.**

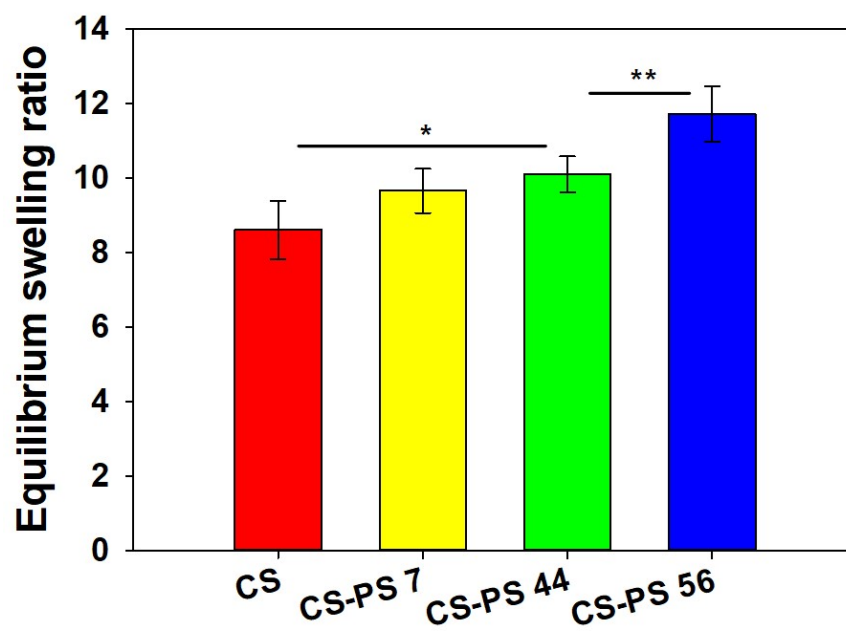

**Fig. S2** Equilibrium swelling ratio of the freeze-dried CS hydrogel and CS-PS hydrogels in PBS at 37°C (Mean ± SD, n=8, \*\*: P<0.01).

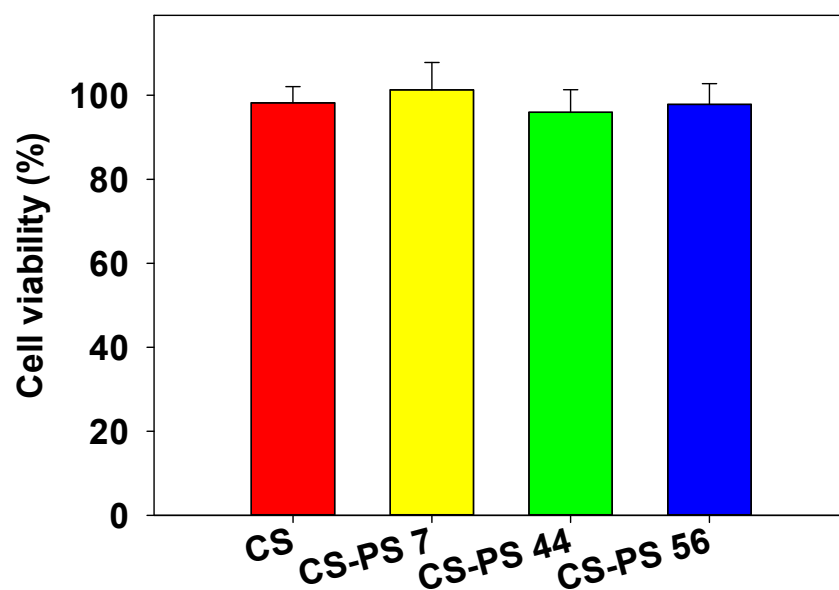

**Fig. S3 cell viability of NIH3T3 cell line by CS and CS-PS hydrogels. Protocol was followed ISO-10993 cytotoxicity test. (Mean  $\pm$  SD, n=6)**

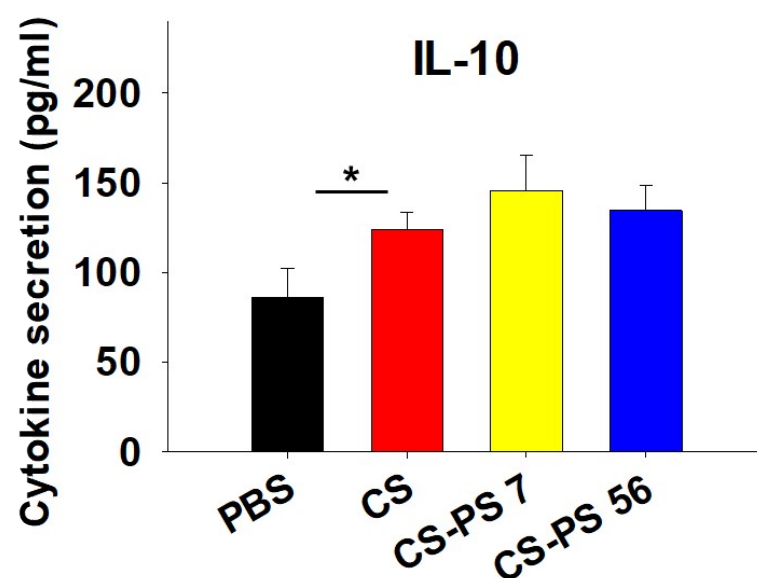

**Fig. S4 Cytokine secretion of IL-10 from macrophage treated by CS and CS-PS hydrogels.**  
(Mean  $\pm$  SD, n=8)

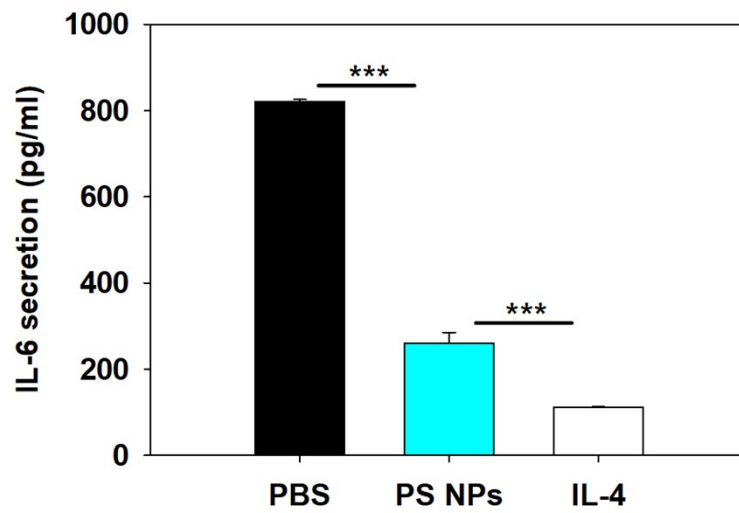

**Fig. S5. Cytokine secretion of the pro-inflammatory cytokine IL6 treated by PS nanoparticle, CS, and CS-PS. (Mean  $\pm$  SD, n=8, \*\*\*:  $p<0.001$ )**

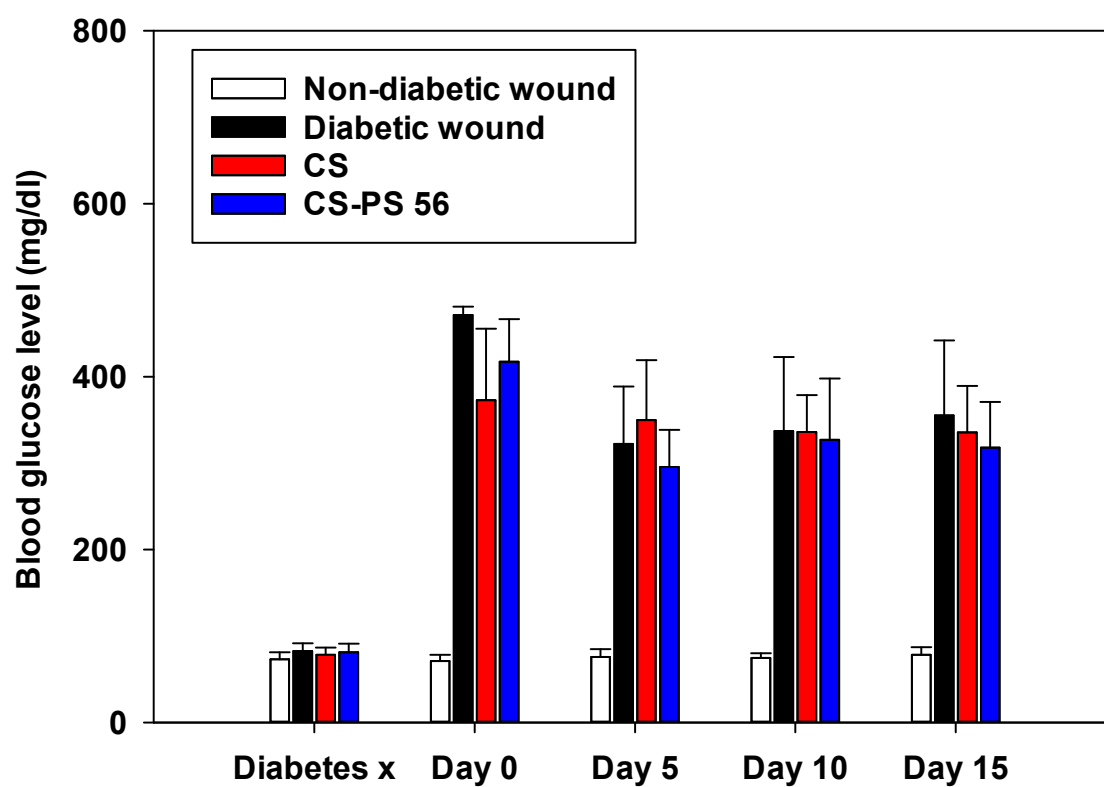

**Fig. S6 Blood glucose level of rats before the introduction of diabetes and during wound healing.**

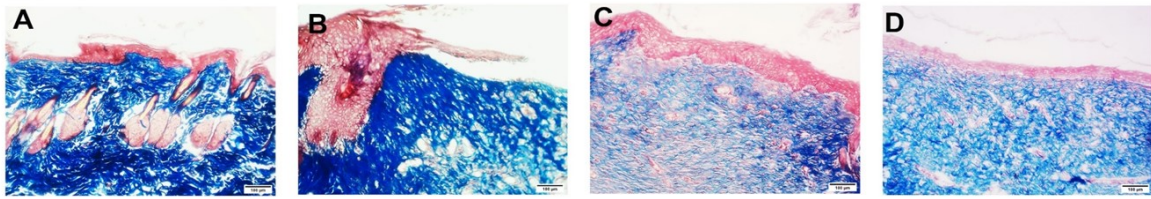

**Fig. S7 Masson's trichrome histological photomicrographs of wound lesion harvested after 15 days of treatment with PU film, CS, and CS-PS. (A: non-diabetic rat treated by PU film; B: diabetic rat treated by polyurethane (PU) film; C: diabetic rat treated by CS; D: diabetic rat treated by CS-PS.)**

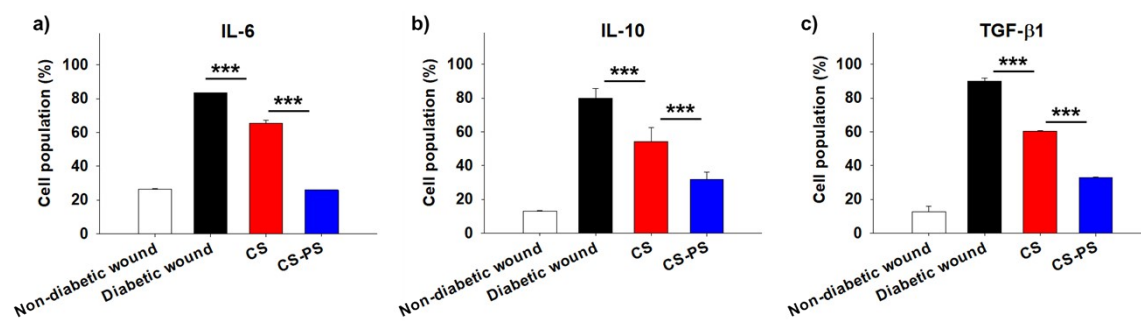

**Fig. S8. Investigated cell populations of a) IL-6, b) IL-10, and c) TGF-β1 positive cells in the wound tissue after 15 days from wound introduction.**

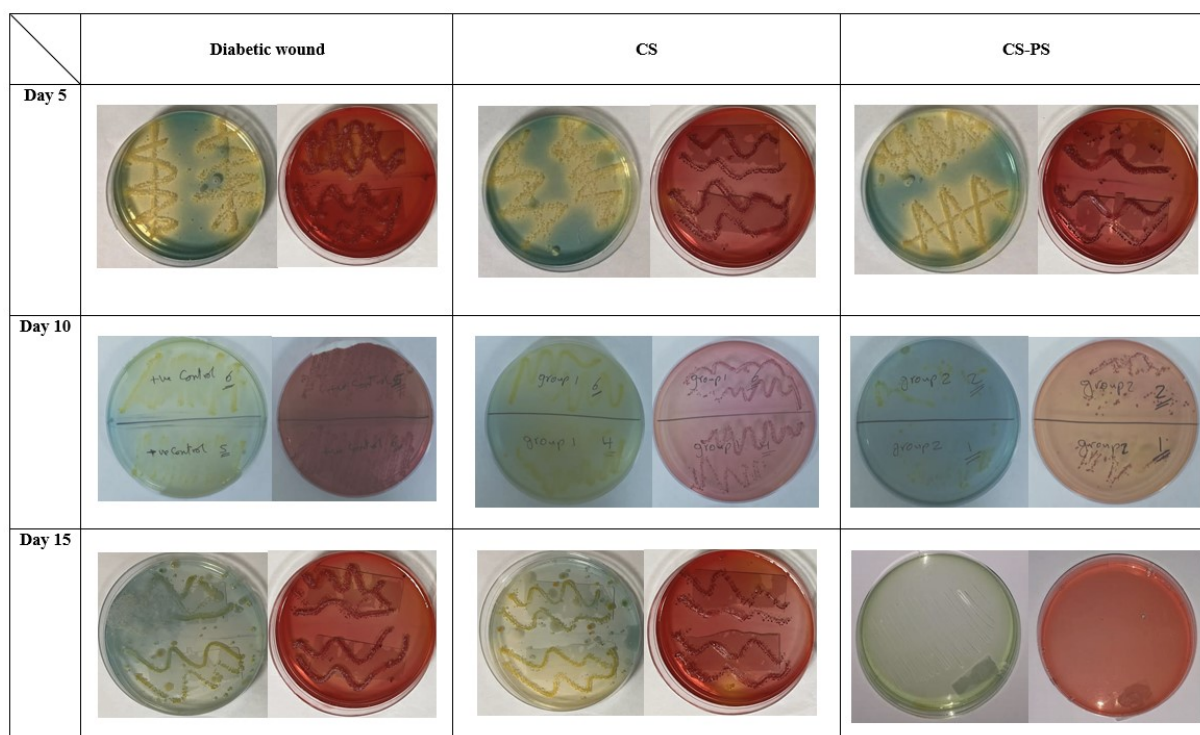

**Fig. S9 Bacterial growth on nutrient agar (blue) and cystine-lactose-electrolyte-deficient (CLED) agar collected from diabetic wound surface treated by PU film, CS, and CS-PS in the day of 5, 10, and 15.**

|                        | Day 5          |           |           | Day 10         |           |           | Day 15         |           |                     |
|------------------------|----------------|-----------|-----------|----------------|-----------|-----------|----------------|-----------|---------------------|
|                        | Diabetic wound | CS        | CS-PS     | Diabetic wound | CS        | CS-PS     | Diabetic wound | CS        | CS-PS               |
| Cefaclor               | Resistant      | Resistant | Resistant | Moderate       | Moderate  | Moderate  | High           | High      | No Bacterial Growth |
| Ceftriaxone            | Moderate       | High      | High      | High           | High      | High      | High           | High      |                     |
| Cefoperazone           | High           | High      | High      | High           | High      | High      | High           | High      |                     |
| Sulbactam + Ampicillin | High           | High      | High      | High           | High      | High      | High           | High      |                     |
| Cefamandole            | Moderate       | High      | Moderate  | Resistant      | Moderate  | Moderate  | Resistant      | High      |                     |
| Levofloxacin           | Resistant      | Moderate  | Resistant | Resistant      | High      | High      | High           | High      |                     |
| Cephalexin             | High           | Resistant | High      | Moderate       | High      | High      | High           | High      |                     |
| Vancomycin             | Resistant      | Resistant | Moderate  | Resistant      | Moderate  | Moderate  | Moderate       | Moderate  |                     |
| Azithromycin           | Resistant      | Moderate  | Moderate  | Resistant      | Resistant | Resistant | Resistant      | Resistant |                     |
| Aztreonam              | Resistant      | Resistant | Resistant | Resistant      | Resistant | Resistant | Resistant      | Resistant |                     |
| Erythromycin           | Resistant      | Resistant | Resistant | Moderate       | Resistant | Resistant | Resistant      | Resistant |                     |
| Nitrofurantoin         | Resistant      | Resistant | Resistant | Moderate       | Resistant | Moderate  | Moderate       | Moderate  |                     |

**Table S2. Diverse anti-biotic susceptibility results of bacteria collected on the diabetic wound on the day 5, 10, and 15.**

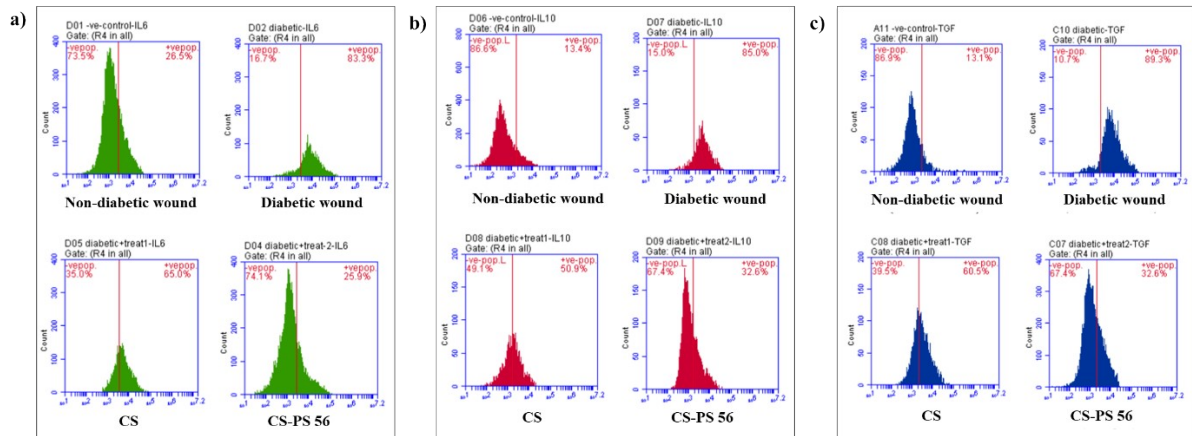

**Fig. S10. Flow cytometry histogram of a) IL-6, b) IL-10, and c) TGF-β1 cells in wound tissues.**
